# Supplementary material for: Combination of float charging and occasional discharging to cause serious LIB degradation analyzed by operando neutron diffraction
Source: Royal Society of Chemistry journal article supplement (doi:10.1039/d3ya00557g), 2023-12-28
Supplement: d3ya00557g2.zip [file Table_of_Contents_Entry.docx]

**Table of Contents Entry**

Negative synergistic effect of a combination of float charging and occasional discharging
